# Supplementary material for: Synthesis of phospholipid monolayer membrane functionalized graphene for drug delivery
Source: Royal Society of Chemistry journal article supplement (doi:10.1039/c2jm34494g), 2012-01-01
Supplement: c2jm34494g.pdf [file c2jm34494g.pdf]

# Synthesis of Phospholipid Monolayer Membrane Functionalized Graphene for Drug Delivery

Jiyang Liu,<sup>a</sup> Shaojun Guo,<sup>a</sup> Lei Han,<sup>a</sup> Tianshu Wang,<sup>a,b</sup> Wei Hong,<sup>a</sup> Yaqing Liu,<sup>\*a</sup> and Erkang Wang<sup>\*a</sup>

## Supplementary Information:

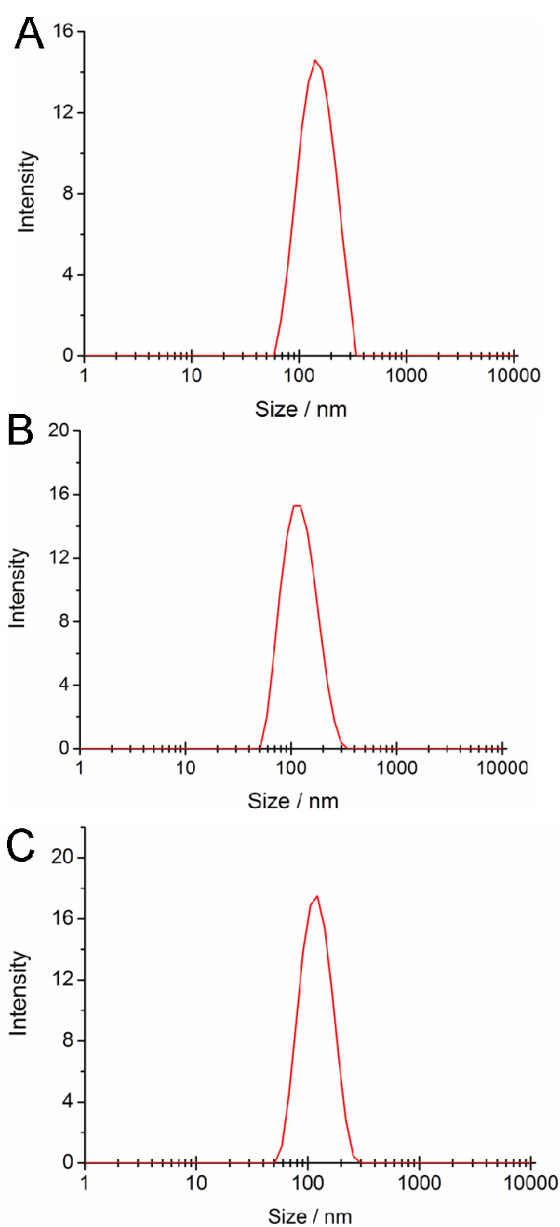

**Fig. S1** Size distribution by DLS intensity of (A) DDAB-liposomes, (B) DMPC-liposomes and (C) DMPG-liposomes at 25 °C

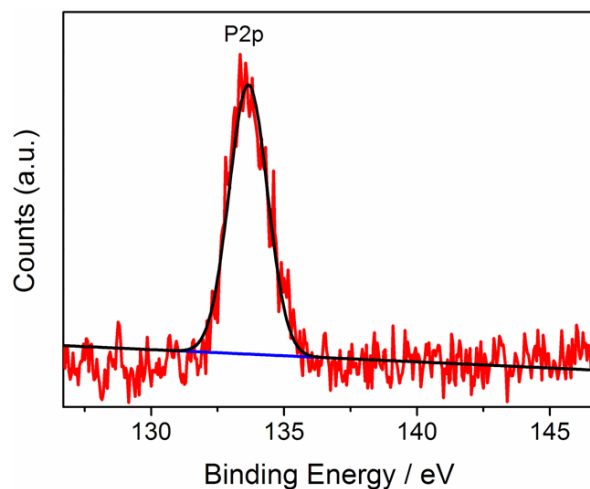

**Fig. S2** Phosphorus 2p XPS profile of DMPG-G

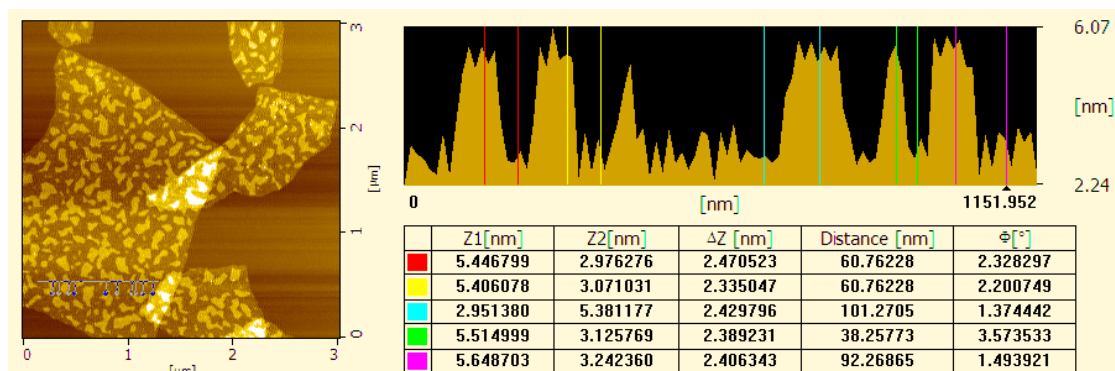

**Fig. S3** Tapping mode AFM image of DMPG-G and corresponding height profiles along the line shown in AFM image.

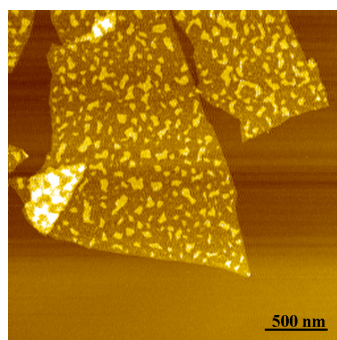

**Fig. S4** Tapping mode AFM image of DMPG-G after keeping it in water at 4 °C for two months

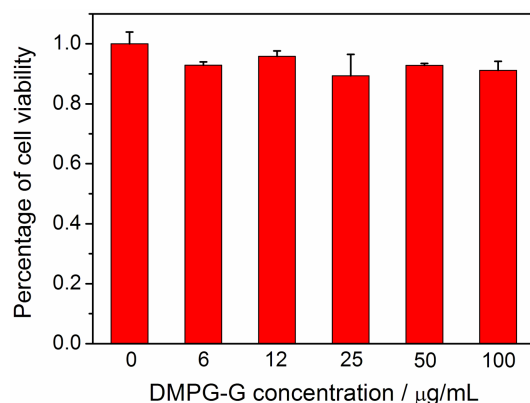

**Fig. S5** MTT toxicity assay results for HEK 293 cells exposed to DMPG-G with various concentrations. The viability of the cells untreated with DMPG-G was served as control group and was taken as 100%. Three parallel samples were performed in each group. The final values were expressed as a percentage of the control (mean  $\pm$  standard deviation).

Human embryonic kidney cells (HEK 293 cells) were chosen for these experiments. The HEK 293 cells (20000 cells/mL) were first plated on a Costar 96-well tissue-culture cluster, and cultured at 37 °C with 5% CO<sub>2</sub> in air overnight to make cells adhere onto the surface. The medium was then changed with 100  $\mu\text{L}$  fresh DMEM (10% FBS) containing different amount of DMPG-G, and the cells were allowed to grow for another 24 h. Cells untreated with DMPG-G were taken as the control group and three parallel samples were performed in each group. After adding 10  $\mu\text{L}$  3-(4, 5-dimethylthiazolyl-2)-2,5-diphenyltetrazolium bromide (MTT) reagents (5 mg/mL) into each well, the cells were allowed to grow for another 4 h until purple precipitate was visible. The medium was then removed and 100  $\mu\text{L}$  DMSO was added. The cluster was vibrated for 15 min to completely liberate the crystals. Finally, the absorption at 490 nm was measured with an EL808 ultra microplate reader (Bio TEK Instrument Inc).

MTT assays were used to evaluate the viability of the HEK 293 cells after incubation with DMPG-G. As shown in Fig. S5, ~90% cells are still metabolically active even when the concentration of DMPG-G is increased to 100  $\mu\text{g/mL}$ . It indicates that the DMPG-G exhibits no obvious cytotoxicity.

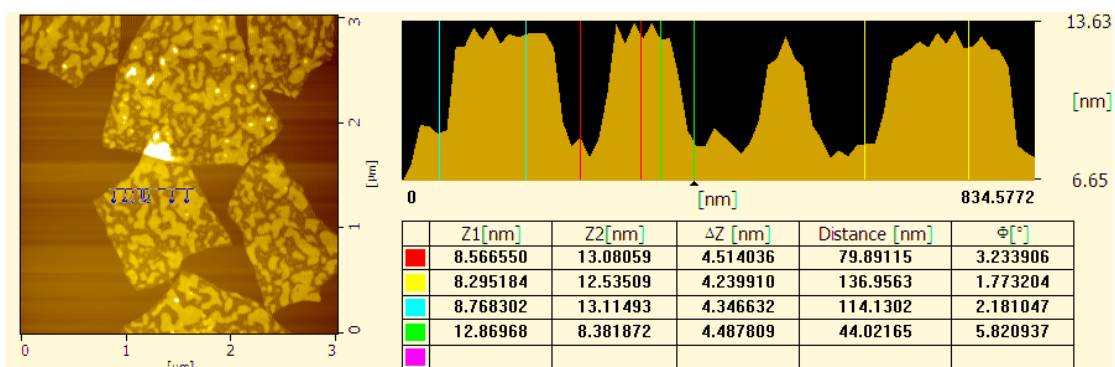

**Fig. S6** Tapping mode AFM image of DMPG-G-DOX and corresponding height profile along the line shown in AFM image.

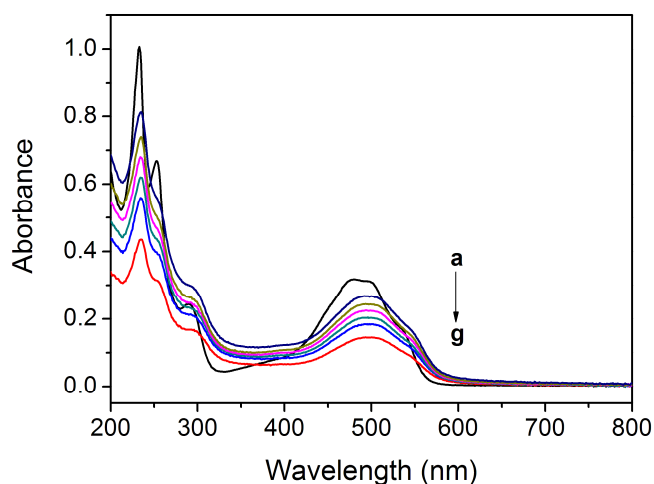

**Fig. S7** UV-vis spectra of (a) free DOX dispersion (200  $\mu\text{g/mL}$ ), (b-g) DMPG-G-DOX dispersions obtained by incubating DMPG-G in DOX solutions with different initial DOX concentrations of 100, 90, 80, 70, 60, 50  $\mu\text{g/mL}$ , respectively. All solutions were diluted 5 times with water before UV-vis measurements.

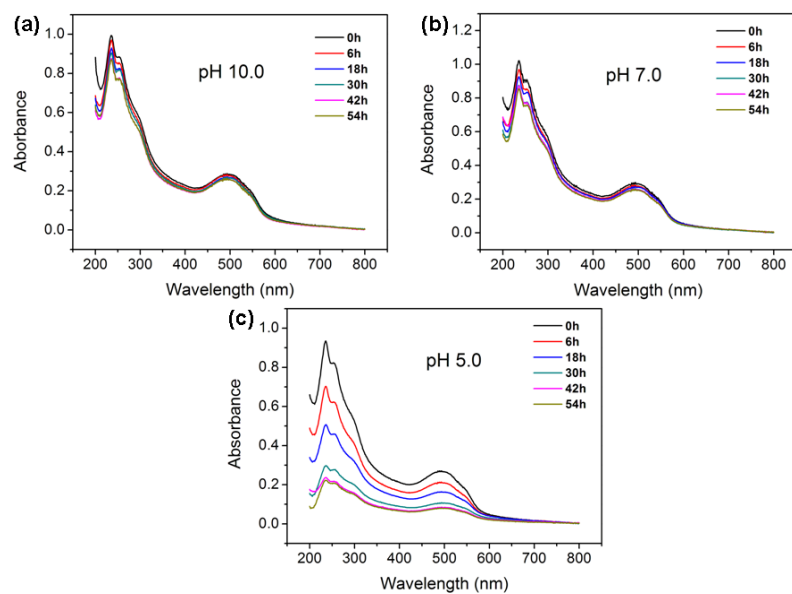

**Fig. S8** UV-vis spectra of DMPG-G-DOX before and after incubation in buffers with different pH at 10.0 (a), 7.0 (b) and 5.0 (c) and with different incubation time. Released free DOX was removed thoroughly by filtration.
